# Supplementary material for: The Textile Plot: A New Linkage Disequilibrium Display of Multiple-Single Nucleotide Polymorphism Genotype Data
Source: PubMed Central journal article supplement (PMC2860502; doi:10.1371/journal.pone.0010207), 2010-04-27
Supplement: pone.0010207.s009.pdf [file pone.0010207.s009.pdf]

**Table 1.** LD statistics ( $r^2/D'$ ) corresponding to Figure 1b.

|               |         | <i>D</i> statistic |               |               |               |
|---------------|---------|--------------------|---------------|---------------|---------------|
|               |         | 0.24               | 0.15          | 0.08          | 0.01          |
| Allele Freq.  | 0.8/0.2 | *                  | *             | *             | 0.0039/0.2500 |
|               | 0.7/0.3 | *                  | *             | 0.1451/0.8889 | 0.0023/0.1111 |
| $\pi_A/\pi_B$ | 0.6/0.4 | *                  | 0.3906/0.9375 | 0.1111/0.5000 | 0.0017/0.0625 |
|               | 0.5/0.5 | 0.9216/0.9600      | 0.3600/0.6000 | 0.1024/0.3200 | 0.0016/0.0400 |
