# Supplementary material for: The Textile Plot: A New Linkage Disequilibrium Display of Multiple-Single Nucleotide Polymorphism Genotype Data
Source: PubMed Central journal article supplement (PMC2860502; doi:10.1371/journal.pone.0010207), 2010-04-27
Supplement: pone.0010207.s011.pdf [file pone.0010207.s011.pdf]

**Table 3.** Mapping between SNPs in *HLA-DPA1* gene and *HLA-DPA1* alleles based on IMGT/HLA databases.

| 124      | 125      | 138        | 153        | 184      | 185      | 242      | 340      | 345      | Allele |
|----------|----------|------------|------------|----------|----------|----------|----------|----------|--------|
| <i>G</i> | <i>C</i> | <i>G/C</i> | <i>G/A</i> | <i>A</i> | <i>T</i> | <i>A</i> | <i>A</i> | <i>C</i> | *0103  |
| <i>G</i> | <i>C</i> | <i>G/C</i> | <i>G/A</i> | <i>C</i> | <i>A</i> | <i>G</i> | <i>G</i> | <i>T</i> | *0201  |
| <i>A</i> | <i>T</i> | <i>C</i>   | <i>G/A</i> | <i>C</i> | <i>A</i> | <i>G</i> | <i>G</i> | <i>T</i> | *0202  |
