# Supplementary material for: The Textile Plot: A New Linkage Disequilibrium Display of Multiple-Single Nucleotide Polymorphism Genotype Data
Source: PubMed Central journal article supplement (PMC2860502; doi:10.1371/journal.pone.0010207), 2010-04-27
Supplement: pone.0010207.s012.pdf [file pone.0010207.s012.pdf]

**Table 4.** Mapping between SNPs in *HLA-DPB1* gene and *HLA-DPB1* alleles based on IMGT/HLA databases.

| 9        | 11       | 13       | 18       | 19       | 90       | 152          | 154      | 158      | 192      | 213      | 215      | 238        | 241      | 243      | 246      | Allele |
|----------|----------|----------|----------|----------|----------|--------------|----------|----------|----------|----------|----------|------------|----------|----------|----------|--------|
| <i>C</i> | <i>T</i> | <i>T</i> | <i>G</i> | <i>G</i> | <i>C</i> | <i>G/C</i>   | <i>C</i> | <i>G</i> | <i>A</i> | <i>A</i> | <i>G</i> | <i>A</i>   | <i>A</i> | <i>G</i> | <i>G</i> | *0501  |
| <i>C</i> | <i>T</i> | <i>T</i> | <i>G</i> | <i>G</i> | <i>T</i> | <i>T/G/C</i> | <i>A</i> | <i>G</i> | <i>G</i> | <i>A</i> | <i>G</i> | <i>G/T</i> | <i>G</i> | <i>C</i> | <i>A</i> | *0201  |
| <i>C</i> | <i>T</i> | <i>T</i> | <i>G</i> | <i>G</i> | <i>C</i> | <i>G/C</i>   | <i>C</i> | <i>G</i> | <i>G</i> | <i>A</i> | <i>G</i> | <i>G/T</i> | <i>G</i> | <i>C</i> | <i>A</i> | *0202  |
| <i>C</i> | <i>T</i> | <i>T</i> | <i>G</i> | <i>G</i> | <i>T</i> | <i>T</i>     | <i>C</i> | <i>G</i> | <i>A</i> | <i>A</i> | <i>G</i> | <i>G/T</i> | <i>G</i> | <i>C</i> | <i>A</i> | *0401  |
| <i>C</i> | <i>T</i> | <i>T</i> | <i>G</i> | <i>G</i> | <i>T</i> | <i>T</i>     | <i>A</i> | <i>G</i> | <i>A</i> | <i>A</i> | <i>G</i> | <i>G/T</i> | <i>G</i> | <i>C</i> | <i>A</i> | *0402  |
| <i>G</i> | <i>G</i> | <i>A</i> | <i>T</i> | <i>T</i> | <i>T</i> | <i>T</i>     | <i>A</i> | <i>C</i> | <i>G</i> | <i>G</i> | <i>A</i> | <i>A</i>   | <i>A</i> | <i>G</i> | <i>G</i> | *0901  |
| <i>G</i> | <i>G</i> | <i>A</i> | <i>T</i> | <i>T</i> | <i>T</i> | <i>T</i>     | <i>A</i> | <i>C</i> | <i>A</i> | <i>G</i> | <i>A</i> | <i>A</i>   | <i>A</i> | <i>G</i> | <i>G</i> | *0301  |
| <i>G</i> | <i>G</i> | <i>A</i> | <i>T</i> | <i>T</i> | <i>T</i> | <i>T</i>     | <i>C</i> | <i>G</i> | <i>G</i> | <i>A</i> | <i>A</i> | <i>A</i>   | <i>A</i> | <i>G</i> | <i>G</i> | *1301  |
| <i>G</i> | <i>G</i> | <i>A</i> | <i>T</i> | <i>T</i> | <i>T</i> | <i>T</i>     | <i>A</i> | <i>C</i> | <i>A</i> | <i>G</i> | <i>A</i> | <i>A</i>   | <i>A</i> | <i>G</i> | <i>G</i> | *1401  |
