# Supplementary material for: The Textile Plot: A New Linkage Disequilibrium Display of Multiple-Single Nucleotide Polymorphism Genotype Data
Source: PubMed Central journal article supplement (PMC2860502; doi:10.1371/journal.pone.0010207), 2010-04-27
Supplement: pone.0010207.s014.pdf [file pone.0010207.s014.pdf]

## Text S2: Solutions of Optimization Problem

We shall provide the proof of obtaining the solution of the optimization problem. Let us define a Lagrangian function

$$L(\alpha, \beta, \xi; \lambda) = \sum_{j=1}^p \|\mathbf{y}_j - \xi\|_{\mathbf{w}_j}^2 - \lambda \left( \sum_{j=1}^p \|\mathbf{y}_j - \bar{y}_{\cdot j} \mathbf{1}\|_{\mathbf{w}_j}^2 - N \right)$$

with Lagrange multiplier  $\lambda \geq 0$ . Then, we have

$$\frac{1}{2} \frac{\partial L}{\partial \alpha_j} = \mathbf{w}_j^T (\mathbf{y}_j - \xi) - \lambda \mathbf{w}_j^T \mathbf{J}_j \mathbf{y}_j = \mathbf{w}_j^T \mathbf{y}_j - \mathbf{w}_j^T \xi,$$

since  $\mathbf{J}_j \mathbf{w}_j = \mathbf{0}$ . Therefore the solution  $\hat{\alpha}_j$  satisfies

$$0 = \mathbf{w}_j^T \mathbf{y}_j - \mathbf{w}_j^T \xi = w_j \hat{\alpha}_j + w_j \bar{\mathbf{x}}_{\cdot j}^T \beta_j - \mathbf{w}_j^T \xi$$

which gives

$$\hat{\alpha}_j = \frac{1}{w_j} \mathbf{w}_j^T \xi - \bar{\mathbf{x}}_{\cdot j}^T \beta_j.$$

Then, we have

$$L(\hat{\alpha}, \beta, \xi; \lambda) = \sum_{j=1}^p \|\tilde{\mathbf{X}}_j \beta_j - \mathbf{J}_j \xi\|_{\mathbf{w}_j}^2 - \lambda \left( \sum_{j=1}^p \|\tilde{\mathbf{X}}_j \beta_j\|_{\mathbf{w}_j}^2 - N \right).$$

By differentiating with respect to  $\beta_j$ , we have

$$\frac{1}{2} \frac{\partial L}{\partial \beta_j} = \tilde{\mathbf{X}}_j^T (\tilde{\mathbf{X}}_j \beta_j - \mathbf{J}_j \xi) - \lambda \tilde{\mathbf{X}}_j^T \tilde{\mathbf{X}}_j \beta_j.$$

Therefore,

$$\mathbf{0} = (1 - \lambda) \tilde{\mathbf{X}}_j^T \tilde{\mathbf{X}}_j \beta_j - \tilde{\mathbf{X}}_j^T \mathbf{J}_j \xi$$

gives the solution of  $\beta_j$  such that

$$\hat{\beta}_j = \frac{1}{1 - \lambda} (\tilde{\mathbf{X}}_j^T \tilde{\mathbf{X}}_j)^{-1} \tilde{\mathbf{X}}_j^T \xi.$$

Then we have

$$L(\hat{\alpha}, \hat{\beta}, \xi; \lambda) = -\frac{1}{\rho} \xi^T \mathbf{A} \xi + \xi^T \mathbf{B} \xi + \lambda N.$$

The differentiation with respect to  $\xi$  gives

$$\frac{1}{2} \frac{\partial L}{\partial \xi} = -\frac{1}{\rho} \mathbf{A} \xi + \mathbf{B} \xi,$$

where  $\rho = 1 - \lambda$ . Therefore, the solution  $\hat{\xi}$  is an eigenvector of  $\mathbf{A}$  with respect to  $\mathbf{B}$  with an eigenvalue  $\hat{\rho}$ . Then we choose  $\hat{\xi}$  so that

$$\sum_{j=1}^p \|\mathbf{y}_j - \bar{y}_{\cdot j} \mathbf{1}\|_{\mathbf{w}_j}^2 = \frac{1}{\hat{\rho}} \hat{\xi}^T \mathbf{B} \hat{\xi} = \frac{1}{\hat{\rho}^2} \hat{\xi}^T \mathbf{A} \hat{\xi} = N$$

is satisfied. The fact that

$$S^2(\hat{\alpha}, \hat{\beta}, \hat{\xi}) = \hat{\lambda} N = N - \hat{\rho} N$$

implies the largest eigenvalue  $\hat{\rho}$  of  $\mathbf{A}$  with respect to  $\mathbf{B}$  attains the minimum of  $S^2$ , since  $S^2 \geq 0$  is always satisfied.
